# Supplementary material for: Analyzing Quantitative Trait Loci for Fiber Quality and Yield-Related Traits From a Recombinant Inbred Line Population With Gossypium hirsutum Race palmeri as One Parent
Source: Front Plant Sci. 2022 Jan 3;12:817748. doi: 10.3389/fpls.2021.817748 (PMC8763314; doi:10.3389/fpls.2021.817748)
Supplement: Supplementary file 1 [file Table_1.XLSX]

## Sheet: 工作表1
	Table S1 Traits performance of the RIL popution and parents accessions
	Traits	Environment	Parents		RIL population
			CCRI35	TX-832	Max	Min	Mean	CV/%	Skewness	Kurtosis
	Boll weight	19CQ	-	-	6.575	2.27	3.84992	0.237865	0.888595	0.786217
	(g)	19KT	6.36	4.63	6.653	2.73667	4.52663	0.199941	0.0528662	-0.0828461
		19CS	-	-	6.02769	2.0225	2.98611	0.225603	1.29454	3.11204
		19SY	4.98	2.51	7.05312	3.04	4.899	0.199606	0.323722	-0.347525
		20KL	-	-	6.6675	3.09966	4.9207	0.197602	0.0780107	-0.177686
		20KT	-	-	7.00059	3.47516	5.07448	0.189708	0.333733	-0.423162
	Seed index	19CQ	-	-	15	7.28	11.002	0.179883	0.520175	-0.0821757
	(g)	19KT	13.03	9.94	14.53	8.09	11.0289	0.152315	0.485307	0.0447669
		19CS	-	-	15.22	7.83	10.8571	0.161691	0.569484	0.512586
		19SY	9.52	8.76	13.7938	7.16	9.6607	0.160675	0.651598	0.721435
		20KL	-	-	14.39	7.08	9.91885	0.155147	0.843439	1.97179
		20KT	11.34	8.52	14.91	7.86	10.3143	0.155981	0.746551	0.724583
	Lint percentage	19CQ	-	-	48.0995	24.933	35.7992	0.173372	-0.071046	-0.0821757
	(%)	19KT	42.86	27.72	45.5506	22.13	38.0635	0.153137	-0.68591	0.0447669
		19CS	-	-	45.1312	18.72	32.7405	0.178991	-0.196191	0.512586
		19SY	42.64	30.31	48.2609	24.7192	39.2726	0.150575	-0.78003	0.721435
		20KL	-	-	48.7397	20.1942	39.3695	0.163226	-0.515371	1.97179
		20KT	46.13	35.35	48.8735	20.5072	40.5463	0.148353	-1.118	0.724583
	Lint index	19SY	7.93	4.31	9.84	3.61	6.06764	0.194662	0.273434	0.639431
	(g)	20KL	-	-	9.57	3.54	6.33641	0.219245	0.261638	-0.333226
		20KT	9.29	4.4	9.52	3.38	7.07062	0.189237	-0.111545	-0.0427185
	Fiber length	19CQ	-	-	34.1	20.6	27.8681	0.10733	-0.0991183	-0.686848
	(mm)	19KT	31.4	20.9	33.2	21.2	27.072	0.0835675	0.13786	-0.286028
		19CS	-	-	31	18.1	23.4189	0.0964586	0.431362	0.578967
		19SY	26.3	20.7	27.7	21.7	25.0556	0.0516699	-0.227929	-0.282331
		20KL	-	-	30.2	20.6	25.8019	0.0723905	-0.280424	-0.0340897
		20KT	28.7	22.5	30.6	21.2	25.6324	0.0721768	-0.0193671	-0.203023
	Fiber Uniformity	19CQ	-	-	86.9	71.2	82.3444	0.0358086	-0.85587	0.505564
	(%)	19KT	85.9	75.6	86.5	76.6	81.6505	0.0243413	-0.00400118	-0.47449
		19CS	-	-	85.3	71	78.7902	0.0279388	0.16924	0.963308
		19SY	82	75.9	84.3	76.1	80.8743	0.0226464	-0.301646	-0.651841
		20KL	-	-	85.8	76.6	81.5268	0.0234229	-0.288613	-0.304981
		20KT	83.6	69.9	85.3	74.6	79.8665	0.0230561	-0.0881002	0.100135
	Fiber Strength	19CQ	-	-	38.6	18.1	28.5474	0.157083	-0.00536034	-0.544924
	(cN/tex)	19KT	30.4	21.6	35.9	19.1	27.6758	0.125454	-0.191832	-0.340633
		19CS	-	-	37.5	16.3	24.1518	0.181221	0.877336	0.4911
		19SY	27.3	26.5	29.6	23	25.1871	0.0642195	0.890649	-0.17172
		20KL	-	-	35.7	20.2	27.414	0.0980049	-0.0738441	0.0548115
		20KT	29.1	24.9	32.5	23.4	26.1462	0.0863409	0.8294	-0.00942626
	Fiber Micronarie	19CQ	-	-	6.6	3	4.74148	0.135675	-0.0297155	0.208267
		19KT	4.3	3.9	5.9	2.9	4.27967	0.138405	0.0971189	-0.163372
		19CS	-	-	6.5	2.7	4.70549	0.174747	-0.0548428	-0.640855
		19SY	4	3.4	6	3	4.5848	0.129091	-0.294333	-0.148899
		20KL	-	-	6.1	3.3	4.81911	0.130298	-0.261462	-0.606393
		20KT	4.9	4.8	6.2	3.4	4.96703	0.106346	-0.248735	-0.0644111
	Fiber elongation	19CQ	-	-	6.9	6.4	6.72148	0.0191116	-0.451984	-0.524277
	(%)	19KT	6.9	6.7	6.9	6.4	6.74725	0.0129691	-0.18819	0.448915
		19CS	-	-	7	6.2	6.50307	0.0198952	0.43999	1.1723
		19SY	6.7	6.8	7	6.5	6.66784	0.0123155	0.851869	2.75363
		20KL	-	-	6.9	6.2	6.52273	0.0212205	-0.400533	0.293312
		20KT	6.7	6.7	7	6.4	6.66704	0.0181309	0.217029	0.420637
