# Supplementary material for: Analyzing Quantitative Trait Loci for Fiber Quality and Yield-Related Traits From a Recombinant Inbred Line Population With Gossypium hirsutum Race palmeri as One Parent
Source: Front Plant Sci. 2022 Jan 3;12:817748. doi: 10.3389/fpls.2021.817748 (PMC8763314; doi:10.3389/fpls.2021.817748)
Supplement: Supplementary file 2 [file Table_2.XLSX]

## Sheet: 工作表1
	Table S2 ANOVA for all traits in the RIL population across six environments
	Trait	Source of variation	df	MS	F
	BW	Genotypes	181	1.81163	4.62**
		Environment	5	99.8498	254.38**
		Error	905	0.39252
	SI	Genotypes	181	5.34835	5.64**
		Environment	5	55.7083	58.80**
		Error	905	0.947459
	LP	Genotypes	181	76.4471	9.61**
		Environment	5	1441.87	181.16**
		Error	905	7.95898
	LI	Genotypes	181	2.52695	4.90**
		Environment	2	44.1389	85.63**
		Error	362	0.515447
	FL	Genotypes	181	14.3275	5.31**
		Environment	5	313.673	116.22**
		Error	905	2.69905
	FU	Genotypes	181	11.2555	3.62**
		Environment	5	231.811	74.55**
		Error	905	3.10952
	FS	Genotypes	181	27.5341	3.86**
		Environment	5	365.282	51.15**
		Error	905	7.14174
	FM	Genotypes	181	1.31011	6.02**
		Environment	5	9.72525	44.66**
		Error	905	0.217738
	FE	Genotypes	181	0.0209617	1.75**
		Environment	5	1.45922	122.05**
		Error	905	0.011956
