# Supplementary material for: Analyzing Quantitative Trait Loci for Fiber Quality and Yield-Related Traits From a Recombinant Inbred Line Population With Gossypium hirsutum Race palmeri as One Parent
Source: Front Plant Sci. 2022 Jan 3;12:817748. doi: 10.3389/fpls.2021.817748 (PMC8763314; doi:10.3389/fpls.2021.817748)
Supplement: Supplementary file 3 [file Table_3.XLSX]

## Sheet: 工作表1
	Table S3 Correlation coefficients among all traits in the RIL population across six environments
	Traits	Environment	BW	SI	LP	LI	FL	FU	FS	FM
	SI	19CQ	0.388**
		19CS	0.242**
		19KT	0.479**
		19SY	0.475**
		20KL	0.562**
		20KT	0.374**
	LP	19CQ	-0.00175722	-0.390**
		19CS	0.0858468	-0.513**
		19KT	-0.000231501	-0.505**
		19SY	0.0214517	-0.348**
		20KL	0.207*	-0.250**
		20KT	0.194*	-0.406**
	LI	19SY	0.401**	0.237**	0.643**
		20KL	0.4311**	0.270**	0.597**
		20KT	0.373**	0.202**	0.672**
	FL	19CQ	0.0489897	0.306**	-0.276**	-
		19CS	0.486**	0.445**	-0.136875	-
		19KT	0.489**	0.349**	-0.0812341	-
		19SY	0.433**	0.322**	0.000877496	0.231**
		20KL	0.418**	0.397**	-0.0942125	0.0586741
		20KT	0.324**	0.453**	-0.0540671	0.214**
	FU	19CQ	-0.0586874	0.226*	-0.222*	-	0.832**
		19CS	0.439**	0.449**	-0.10059	-	0.770**
		19KT	0.398**	0.362**	0.0199202	-	0.754**
		19SY	0.384**	0.329**	0.0721105	0.282**	0.762**
		20KL	0.384**	0.316**	0.148581	0.230**	0.714**
		20KT	0.324**	0.406**	0.0974257	0.307**	0.640**
	FS	19CQ	0.0728444	0.338**	-0.300**	-	0.864**	0.728**
		19CS	0.385**	0.363**	-0.129736	-	0.734**	0.566**
		19KT	0.466**	0.368**	-0.125477	-	0.822**	0.651**
		19SY	0.403**	0.325**	-0.0419705	0.228**	0.733**	0.617**
		20KL	0.388**	0.515**	-0.174*	0.0649559	0.802**	0.692**
		20KT	0.286**	0.494**	-0.100983	0.186**	0.871**	0.518**
	FM	19CQ	0.0642282	-0.175*	0.383**	-	-0.534**	-0.522**	-0.546**
		19CS	-0.0462865	-0.383**	0.447**	-	-0.409**	-0.323**	-0.201*
		19KT	-0.164*	-0.333**	0.604**	-	-0.337**	-0.326**	-0.351**
		19SY	0.180*	-0.142624	0.570**	0.466**	-0.240**	-0.049	-0.120
		20KL	-0.00867163	-0.329**	0.629**	0.386**	-0.388**	-0.156	-0.427**
		20KT	-0.0234448	-0.343**	0.532**	0.398**	-0.286**	-0.181*	-0.312**
	FE	19CQ	-0.0541969	0.238**	-0.203*	-	0.782**	0.745**	0.776**	-0.428**
		19CS	0.244**	0.184*	0.0269151	-	0.427**	0.308**	0.649**	0.108513
		19KT	0.330**	0.305**	-0.0163094	-	0.671**	0.537**	0.650**	-0.145
		19SY	0.0261231	0.0108646	0.0754457	0.102054	0.124**	0.0962929	0.309**	0.121008
		20KL	0.385**	0.332**	0.132966	0.178*	0.599**	0.477**	0.631**	-0.00769014
		20KT	-0.110191	0.212**	-0.211*	-0.11383	0.359**	0.103046	0.519**	-0.147774
