# Supplementary material for: Analyzing Quantitative Trait Loci for Fiber Quality and Yield-Related Traits From a Recombinant Inbred Line Population With Gossypium hirsutum Race palmeri as One Parent
Source: Front Plant Sci. 2022 Jan 3;12:817748. doi: 10.3389/fpls.2021.817748 (PMC8763314; doi:10.3389/fpls.2021.817748)
Supplement: Supplementary file 4 [file Table_4.XLSX]

## Sheet: 工作表1
	Table S4 Number of SLAF in each chromosome
	Chromosome	SLAF number	Polymorphic SLAF number
	A01	18985	12061
	A02	21303	9526
	A03	21360	9202
	A04	17047	4023
	A05	19703	10913
	A06	23728	14841
	A07	17952	9721
	A08	21817	12967
	A09	15294	8595
	A10	20488	12681
	A11	22379	12293
	A12	19818	6673
	A13	20249	11645
	D01	9916	4826
	D02	11258	6015
	D03	8901	5776
	D04	9461	3657
	D05	9792	3469
	D06	10354	5384
	D07	9078	3480
	D08	11197	5249
	D09	7888	3624
	D10	10547	5708
	D11	11410	4516
	D12	9749	3587
	D13	10063	5017
