# Supplementary material for: Analyzing Quantitative Trait Loci for Fiber Quality and Yield-Related Traits From a Recombinant Inbred Line Population With Gossypium hirsutum Race palmeri as One Parent
Source: Front Plant Sci. 2022 Jan 3;12:817748. doi: 10.3389/fpls.2021.817748 (PMC8763314; doi:10.3389/fpls.2021.817748)
Supplement: Supplementary file 5 [file Table_5.XLSX]

## Sheet: 工作表1
	Table S5 Name of SSR primers used in the present study
	SSR Name
	BNL0830
	BNL1597
	BNL2599
	BNL2977
	CCRI000068
	CCRI000488
	CCRI000811
	CCRI001073
	CCRI001078
	CCRI001175
	CCRI002167
	CCRI002217
	CCRI002433
	CCRI002844
	CCRI003218
	CCRI003785
	CCRI004413
	CCRI004764
	CCRI005377
	CCRI006006
	CCRI006278
	CCRI007668
	CCRI007729
	CCRI007759
	CCRI009685
	CCRI009690
	CCRI009781
	CCRI011064
	CCRI011488
	CCRI011663
	CCRI011700
	CCRI011789
	CCRI011844
	CCRI012113
	CCRI012359
	CCRI012420
	CCRI012653
	CCRI012697
	CCRI012934
	CGR5108
	CGR5152
	CGR5553
	CGR6514
	DPL0301
	DPL0398
	DPL0504
	DPL0811
	GH075
	GH110
	GH144
	GH169
	GH220
	GH268
	GH329
	GH654
	HAU0263
	HAU0867
	HAU1012
	HAU1128
	HAU1137
	HAU1311
	HAU1634
	HAU1701
	HAU1807
	HAU1923
	HAU1951
	HAU2724
	HAU3081
	HAU3137
	HAU3150
	NAU0920
	NAU1272
	NAU2253
	NAU2653
	NAU2869
	NAU3424
	NAU3657
	NAU3837
	NAU5013
	NAU5228
	NAU5279
	NAU5434
	NAU5505
	NAU6582
	NBRI0319
	NBRI0419
	NBRI0512
	NBRI0718
	NBRI0728
	NBRI0890
	NBRI1144
	NBRI1147
	NBRI1156
	NBRI1260
	NBRI1267
	NBRI1278
	NBRI1332
	NBRI1606
	NBRI1865
	NBRI1882
	NBRI2222
	NBRI2227
	SHIN1337
	SHIN1339
	SHIN1421
	SHIN1605
	STV106
	SWU10332
	SWU10658
	SWU10778
	SWU11316
	SWU11857
	SWU11863
	SWU12001
	SWU12028
	SWU12825
	SWU13100
	SWU13828
	SWU14034
	SWU14615
	SWU14732
	SWU15391
	SWU16676
	SWU16830
	SWU17234
	SWU17254
	SWU17556
	SWU18890
	SWU18922
	SWU18931
	SWU18938
	SWU18951
	SWU18994
	SWU19024
	SWU19118
	SWU19125
	SWU19144
	SWU20494
	SWU20587
	SWU21064
	SWU21445
	SWU21451
	SWU21546
	SWU21662
	SWU21667
	SWU21683
	SWU21736
	SWU21848
	SWU22300
	SWU22328
	SWU22373
	SWU22528
	SWU22543
