# Supplementary material for: Analyzing Quantitative Trait Loci for Fiber Quality and Yield-Related Traits From a Recombinant Inbred Line Population With Gossypium hirsutum Race palmeri as One Parent
Source: Front Plant Sci. 2022 Jan 3;12:817748. doi: 10.3389/fpls.2021.817748 (PMC8763314; doi:10.3389/fpls.2021.817748)
Supplement: Supplementary file 6 [file Table_6.XLSX]

## Sheet: 工作表1
	Table S6 Details of SDRs identified in the present study
	ID	Chromosome	Interval	Distance (cM)	Chromosome coverage (%)	Skewed towards
	SDRA01.1	A01	0.00-93.18	93.184	51.6435	CCRI35
	SDRA01.2	A01	110.02-116.08	6.06	3.35851	CCRI35
	SDRA01.3	A01	152.05-157.58	5.528	3.06367	TX-832
	SDRA01.4	A01	178.89-180.44	1.546	0.856809	CCRI35
	SDRA02.1	A02	0.00-57.10	57.101	30.9042	CCRI35
	SDRA02.2	A02	76.56-79.24	2.674	1.44722	CCRI35
	SDRA03.1	A03	0-235.46	235.464	95.0283	CCRI35
	SDRA04.1	A04	0-39.65	39.651	28.2031	CCRI35
	SDRA04.2	A04	66.66-84.95	18.289	13.0087	CCRI35
	SDRA04.3	A04	90.62-140.59	49.976	35.5471	CCRI35
	SDRA05.1	A05	43.26-100.68	57.427	27.0038	CCRI35
	SDRA05.2	A05	126.32-131.79	5.472	2.57309	CCRI35
	SDRA05.3	A05	136.47-158.73	22.262	10.4682	CCRI35
	SDRA05.4	A05	163.57-205.83	42.257	19.8704	CCRI35
	SDRA06.1	A06	0.00-59.18	59.175	42.6628	CCRI35
	SDRA06.2	A06	70.29-97.78	27.49	19.8192	CCRI35
	SDRA06.3	A06	115.90-138.70	22.801	16.4386	CCRI35
	SDRA07.1	A07	15.62-105.47	89.853	42.0855	CCRI35
	SDRA07.2	A07	108.57-200.89	92.318	43.2401	CCRI35
	SDRA08.1	A08	0.00-8.53	8.525	3.99432	CCRI35
	SDRA08.2	A08	82.92-84.08	1.156	0.541635	CCRI35
	SDRA08.3	A08	94.29-101.49	7.205	3.37585	TX-832
	SDRA08.4	A08	154.24-199.67	45.424	21.2831	CCRI35
	SDRA09.1	A09	57.51-60.92	3.411	1.64656	CCRI35
	SDRA09.2	A09	67.37-69.58	2.216	1.06971	CCRI35
	SDRA09.3	A09	83.74-108.47	24.725	11.9353	CCRI35
	SDRA09.4	A09	121.96-138.15	16.194	7.81718	TX-832
	SDRA09.5	A09	180.40-181.76	1.36	0.656501	CCRI35
	SDRA09.6	A09	205.39-207.16	1.766	0.852485	CCRI35
	SDRA10.1	A10	0.00-185.20	185.201	100	CCRI35
	SDRA11.1	A11	0.00-12.27	12.272	5.06615	CCRI35
	SDRA11.2	A11	27.32-43.95	16.632	6.86606	CCRI35
	SDRA11.3	A11	72.00-75.03	3.03	1.25085	CCRI35
	SDRA11.4	A11	99.02-209.50	110.482	45.6094	CCRI35
	SDRA11.5	A11	219.62-242.24	22.615	9.33598	CCRI35
	SDRA12.1	A12	0-24.70	24.696	10.8037	CCRI35
	SDRA12.2	A12	34.63-51.65	17.021	7.44612	CCRI35
	SDRA12.3	A12	70.80-112.62	41.821	18.2953	CCRI35
	SDRA12.4	A12	151.55-227.54	75.987	33.2418	CCRI35
	SDRA13.1	A13	0-28.39	28.386	15.458	CCRI35
	SDRA13.2	A13	84.24-183.63	99.396	54.1275	CCRI35
	SDRD01.1	D01	0-22.57	22.571	13.5245	CCRI35
	SDRD01.2	D01	26.86-31.62	4.762	2.85338	CCRI35
	SDRD01.3	D01	44.99-102.58	57.588	34.5066	CCRI35
	SDRD01.4	D01	106.94-163.51	56.57	33.8966	CCRI35
	SDRD02.1	D02	0-137.87	137.873	100	CCRI35
	SDRD03.1	D03	16.90-39.80	22.903	17.4332	CCRI35
	SDRD03.2	D03	52.67-123.00	70.329	53.5326	CCRI35
	SDRD04.1	D04	0-33.03	33.031	27.6584	CCRI35
	SDRD04.2	D04	34.78-72.17	37.393	31.3109	CCRI35
	SDRD04.3	D04	80.70-83.17	2.467	2.06573	CCRI35
	SDRD04.4	D04	93.59-119.43	25.831	21.6295	CCRI35
	SDRD05.1	D05	0.00-63.56	63.556	39.8838	CCRI35
	SDRD05.2	D05	100.35-146.02	45.672	28.6609	CCRI35
	SDRD05.3	D05	150.07-153.31	3.244	2.03573	CCRI35
	SDRD06.1	D06	32.38-61.43	29.048	20.6892	CCRI35
	SDRD06.2	D06	65.93-84.17	18.244	12.9941	CCRI35
	SDRD06.3	D06	99.60-114.15	14.551	10.3638	CCRI35
	SDRD06.4	D06	130.71-140.40	9.693	6.90375	CCRI35
	SDRD07.1	D07	0.00-114.94	114.938	61.6128	CCRI35
	SDRD07.2	D07	140.73-144.74	4.007	2.14796	CCRI35
	SDRD07.3	D07	147.53-186.55	39.022	20.9178	CCRI35
	SDRD08.1	D08	0.31-46.78	46.474	28.3136	CCRI35
	SDRD08.2	D08	62.40-64.77	2.368	1.44267	CCRI35
	SDRD08.3	D08	87.78-102.10	14.322	8.72548	TX-832
	SDRD08.4	D08	133.68-164.14	30.458	18.5561	CCRI35
	SDRD09.1	D09	0.00-39.28	39.275	22.7704	CCRI35
	SDRD09.2	D09	58.16-61.52	3.355	1.94512	CCRI35
	SDRD09.3	D09	65.90-70.82	4.924	2.85477	CCRI35
	SDRD09.4	D09	102.04-147.13	45.095	26.1446	CCRI35
	SDRD09.5	D09	170.26-172.48	2.226	1.29056	CCRI35
	SDRD10.1	D10	26.05-64.16	38.104	18.5892	CCRI35
	SDRD10.2	D10	93.80-144.08	50.278	24.5284	CCRI35
	SDRD10.3	D10	153.97-159.36	5.396	2.63246	TX-832
	SDRD10.4	D10	176.14-181.29	5.147	2.51099	CCRI35
	SDRD11.1	D11	7.71-89.12	81.41	50.9912	CCRI35
	SDRD11.2	D11	110.77-159.66	48.889	30.6217	CCRI35
	SDRD12.1	D12	35.04-144.17	109.132	52.9487	CCRI35
	SDRD13.1	D13	0.00-62.69	62.685	45.5354	CCRI35
	SDRD13.2	D13	64.91-127.65	62.741	45.5761	CCRI35
