# Supplementary material for: Analyzing Quantitative Trait Loci for Fiber Quality and Yield-Related Traits From a Recombinant Inbred Line Population With Gossypium hirsutum Race palmeri as One Parent
Source: Front Plant Sci. 2022 Jan 3;12:817748. doi: 10.3389/fpls.2021.817748 (PMC8763314; doi:10.3389/fpls.2021.817748)
Supplement: Supplementary file 7 [file Table_7.XLSX]

## Sheet: 工作表1
	Table S7 QTL for fiber quality traits identified in the persent study
Triat	ID	Environment	Chromosome	Position	Locus	LOD	PVE (%)	Additive Effect	Confidence Intervel
FL	qFL_A01.1	19KT	A01	58.802	Marker00775	4.91	11.7	0.89a	55.43-65.06
		19CS	A01	57.325	Marker00622	3.65	9.7	0.82a	54.05-65.06
		19SY	A01	66.375	Marker01035	3.48	9	0.40a	55.43-68.98
		20KT	A01	57.325	Marker00622	4.31	10.3	0.70a	49.63-60.11
	qFL_A01.2	19KT	A01	85.028	Marker04625	3.84	9.3	0.81a	81.40-87.50
		19CS	A01	84.452	Marker03835	3.37	9	0.81a	80.15-93.18
		19SY	A01	76.112	Marker01592	3.61	9.3	0.37a	72.89-85.46
		20KT	A01	84.452	Marker02447	3.44	8.3	0.64a	73.90-87.93
	qFL_A01.3	19CQ	A01	88.211	Marker09667	3.41	11	0.27b	86.17-90.09
	qFL_A02.1	19KT	A02	50.104	Marker19471	4.36	10.5	0.86a	39.00-54.90
		19CS	A02	52.644	Marker19541	3.58	9.6	0.78a	35.37-55.04
	qFL_A02.2	19KT	A02	77.57	Marker19901	3.12	7.6	0.51a	68.40-81.51
	qFL_A02.3	19KT	A02	125.151	Marker20524	4.03	9.7	0.75a	121.01-132.54
		19CS	A02	125.151	Marker20524	4.45	11.8	0.84a	116.19-132.54
	qFL_A02.4	20KL	A02	150.104	Marker20577	3.19	8.9	0.56a	141.13-155.22
	qFL_A03.1	19KT	A03	83.429	Marker21339	3.64	8.8	0.84a	80.68-85.31
	qFL_A03.2	19KT	A03	135.155	Marker22342	3.18	7.7	0.12b	120.35-141.51
	qFL_A03.3	19KT	A03	155.482	Marker23011	4.75	11.3	0.90a	147.24-163.34
		20KT	A03	156.353	Marker23042	3.04	7.4	0.56a	151.50-164.64
	qFL_A04.1	20KL	A04	43.408	Marker24078	3.09	8.7	0.49b	38.18-56.71
	qFL_A05.1	19CS	A05	46.452	Marker25726	3.09	8.3	0.73a	43.26-58.67
	qFL_A05.2	19KT	A05	87.829	Marker26228	4.98	11.8	0.86a	82.37-93.34
	qFL_A06.1	19CS	A06	74.927	Marker34288	3.1	8.3	0.69a	71.96-77.68
	qFL_A07.1	19KT	A07	28.718	Marker36348	4.16	10	0.87a	24.57-32.29
	qFL_A07.2	19KT	A07	42.371	Marker36445	4.23	10.1	0.87a	42.37-59.71
	qFL_A08.1	20KL	A08	26.48	Marker39542	3.69	10.3	0.60a	0.00-27.52
	qFL_A08.2	19KT	A08	118.79	Marker50152	3.52	8.5	0.66a	117.33-130.51
		19CS	A08	127.989	Marker50287	3.6	9.6	0.78a	117.33-132.45
		19SY	A08	127.989	Marker50287	4.74	12	0.49a	122.12-130.51
		20KT	A08	118.79	Marker50152	3.72	9	0.55a	117.33-124.31
	qFL_A08.3	19CQ	A08	138.114	Marker50441	3.47	11.2	1.05b	133.61-139.29
	qFL_A08.4	19SY	A08	148.231	Marker50662	4.42	11.2	0.50a	144.98-151.15
	qFL_A08.5	19KT	A08	190.687	Marker50734	4.22	10.1	0.80a	181.93-196.80
		19SY	A08	182.649	Marker50692	3.44	8.9	0.43a	181.93-196.80
		20KT	A08	190.259	Marker50714	3.29	8	0.53a	181.93-196.80
	qFL_A09.1	19CS	A09	60.916	Marker51450	3.47	9.3	0.77a	53.93-68.54
		19SY	A09	57.505	Marker51311	3.22	8.3	0.41a	48.62-59.56
		20KT	A09	57.505	Marker51311	4.15	10	0.65a	49.54-59.56
	qFL_A10.1	19KT	A10	15.161	Marker52953	3.36	8.1	0.71a	12.30-17.64
	qFL_A10.2	19KT	A10	101.141	Marker61325	3.07	7.5	0.75a	97.06-104.35
	qFL_A10.3	19KT	A10	152.664	Marker62731	3.71	9	0.79a	145.60-157.69
		19CS	A10	147.758	Marker62707	3.85	10.2	0.74a	138.02-156.50
		20KL	A10	156.503	Marker62818	3.26	9.1	0.68a	145.60-157.69
		20KT	A10	151.701	Marker62719	4.68	11.2	0.71a	133.29-153.97
	qFL_A12.1	19CS	A12	1.48	Marker65532	3.22	8.7	0.74a	0.00-8.66
	qFL_A12.2	19KT	A12	28.799	Marker65644	5.95	14	0.80a	24.70-30.84
	qFL_A12.3	19KT	A12	78.282	Marker66747	10.7	23.7	1.25a	75.54-82.39
		19CS	A12	79.582	Marker66931	5.83	15.1	1.01a	78.28-82.39
		19SY	A12	78.282	Marker66747	5.52	13.8	0.55a	74.98-96.15
		20KL	A12	79.582	Marker66931	3.86	10.7	0.67a	76.11-99.60
		20KT	A12	79.582	Marker66931	6.03	14.2	0.77a	77.71-96.15
	qFL_A13.1	19KT	A13	5.465	Marker67715	3.29	8	0.79a	0.00-11.65
	qFL_A13.2	19KT	A13	26.044	Marker67792	3.09	7.5	0.62a	19.32-34.09
	qFL_A13.3	19CS	A13	48.262	Marker68018	4.36	11.5	0.83a	43.63-50.35
		20KT	A13	48.405	Marker68032	3.59	8.7	0.59a	43.63-54.05
	qFL_A13.4	19KT	A13	100.469	SWU22300	4.62	11	0.83a	93.98-102.67
		19CS	A13	100.469	SWU22300	3.61	9.6	0.74a	93.98-111.28
		20KT	A13	100.469	SWU22300	5.8	13.7	0.75a	99.04-107.50
	qFL_D01.1	19KT	D01	21.116	Marker70784	6.88	16	0.99a	18.19-24.75
		19CS	D01	22.571	Marker70811	4.09	10.9	0.82a	15.27-31.62
		20KT	D01	27.876	Marker70887	4.24	10.2	0.67a	20.39-39.54
	qFL_D01.2	20KT	D01	62.408	Marker71197	3.28	8	0.62a	61.35-75.95
	qFL_D02.1	19KT	D02	31.492	Marker75185	4.87	11.6	0.93a	29.77-36.57
	qFL_D03.1	19KT	D03	42.684	Marker77846	4.15	10	0.79a	27.09-45.27
		19CS	D03	31.162	Marker77817	4.08	10.8	0.79a	21.27-39.80
		20KT	D03	31.162	Marker77817	4.45	10.7	0.67a	21.27-39.80
	qFL_D03.2	19CS	D03	57.996	Marker77901	3.01	8.1	0.65a	52.67-62.65
	qFL_D04.1	19KT	D04	56.568	Marker79239	3.86	9.3	0.79a	52.65-72.03
	qFL_D04.2	19KT	D04	94.524	Marker80687	4.98	11.8	0.87a	86.76-103.82
		19CS	D04	105.448	Marker80762	3.01	8.1	0.74a	98.46-119.43
	qFL_D05.1	19CQ	D05	14.455	Marker80925	3.05	9.9	1.02b	11.93-17.22
	qFL_D05.2	19KT	D05	37.795	Marker81076	3.44	8.3	0.74a	21.77-65.66
		19CS	D05	59.593	Marker81190	3.07	8.3	0.74a	46.24-65.66
		20KL	D05	46.239	Marker81098	3.36	9.4	0.68a	37.80-59.31
		20KT	D05	37.072	Marker81081	3.21	7.8	0.57a	35.59-63.56
	qFL_D05.3	20KL	D05	116.73	Marker81848	3.7	10.3	0.70a	115.57-123.99
		20KT	D05	116.444	Marker81845	4.51	10.8	0.65a	115.57-123.99
	qFL_D07.1	19KT	D07	83.29	Marker85243	4.11	9.9	0.78a	76.74-85.60
		20KL	D07	85.597	SWU10332	3.12	8.8	0.68a	73.07-88.29
		20KT	D07	76.742	Marker85164	4.92	11.7	0.74a	73.21-84.16
	qFL_D07.2	19KT	D07	105.996	Marker85522	3.59	8.7	0.72a	103.94-107.60
		19CS	D07	105.996	Marker85522	3.32	8.9	0.81a	102.93-108.61
	qFL_D07.3	19CS	D07	143.293	Marker86065	4.3	11.4	0.68a	137.01-147.32
	qFL_D08.1	19KT	D08	23.014	Marker86655	7.25	16.8	1.08a	13.24-35.74
		19CS	D08	23.014	Marker86655	4.73	12.4	0.95a	13.24-38.32
		20KL	D08	35.738	Marker86768	5.83	15.7	0.87a	33.66-41.40
		20KT	D08	35.738	Marker86768	5.8	13.6	0.80a	33.66-46.78
	qFL_D08.2	20KT	D08	69.645	Marker88431	4.92	11.7	0.60a	62.98-73.05
	qFL_D08.3	20KT	D08	133.682	CGR6514	3.02	7.4	0.57a	118.09-138.59
	qFL_D09.1	20KL	D09	35.026	Marker89692	3.62	10.1	0.69a	32.28-38.27
	qFL_D09.2	19KT	D09	120.147	Marker91618	4.08	9.8	0.76a	105.28-125.84
		19SY	D09	105.276	Marker91436	3.35	8.6	0.44a	101.90-109.17
		20KT	D09	106.575	BNL2977	3.05	7.4	0.59a	102.04-121.88
	qFL_D10.1	19KT	D10	43.065	Marker92199	5.56	13.1	0.99a	29.74-49.90
		19CS	D10	43.065	Marker92199	3.34	9	0.82a	28.26-46.94
	qFL_D10.2	19CS	D10	101.975	Marker92666	3.69	9.8	0.83a	94.95-108.73
		20KT	D10	101.975	Marker92666	3.03	7.4	0.60a	93.80-107.42
	qFL_D10.3	19KT	D10	141.168	Marker94170	3.61	8.7	0.75a	133.31-143.92
		19CS	D10	135.573	Marker94078	3.99	10.6	0.83a	130.12-143.92
		19SY	D10	143.347	Marker94270	3.42	8.8	0.43a	121.01-150.55
		20KT	D10	129.116	Marker93611	4.03	9.7	0.37a	121.01-129.54
	qFL_D10.4	19KT	D10	165.213	Marker94611	3.28	8	0.71a	163.11-176.14
		19CS	D10	165.213	Marker94611	4.27	11.3	0.79a	163.11-176.14
		20KL	D10	165.213	Marker94611	4.91	13.4	0.65a	162.10-176.14
	qFL_D11.1	19KT	D11	73.482	Marker95709	5.68	13.4	0.95a	65.01-78.41
		19CS	D11	73.482	Marker95709	3.71	9.9	0.77a	64.14-80.36
		19SY	D11	73.482	Marker95709	9.54	22.6	0.70a	68.99-82.70
		20KL	D11	73.482	Marker95709	3.79	10.5	0.69a	70.75-82.27
		20KT	D11	64.14	Marker95400	4.84	11.5	0.65a	60.73-89.12
	qFL_D12.1	19KT	D12	26.726	Marker97214	4.48	10.7	0.83a	25.09-47.86
		19CS	D12	47.864	Marker97335	6.45	16.6	1.07a	43.44-47.86
		20KL	D12	26.726	Marker97214	5.32	14.4	0.81a	25.09-47.86
		20KT	D12	26.726	Marker97214	4.13	9.9	0.68a	25.09-47.86
	qFL_D12.2	19KT	D12	91.318	Marker99078	4.2	10.1	0.76a	85.88-110.13
		19SY	D12	96.929	Marker99154	4.87	12.3	0.53a	85.88-105.92
		20KT	D12	91.318	Marker99078	5.17	12.3	0.72a	85.88-110.13
	qFL_D12.3	19KT	D12	129.957	Marker99709	5.25	12.4	0.97a	127.47-137.59
		19CS	D12	130.857	Marker99718	6.19	15.9	1.11a	129.07-133.82
		20KT	D12	137.585	Marker99834	4.41	10.5	0.69a	130.86-138.61
	qFL_D13.1	19KT	D13	31.107	Marker100487	4.77	11.4	0.91a	26.57-35.83
		19SY	D13	41.199	Marker100810	3.4	8.7	0.43a	25.27-45.51
		20KT	D13	39.749	Marker100794	3.71	9	0.64a	25.27-44.54
	qFL_D13.2	19KT	D13	58.224	Marker102240	8.77	19.9	1.13a	55.59-61.83
		19CS	D13	58.653	Marker102245	6.07	15.7	1.00a	55.59-67.34
		19SY	D13	55.594	Marker102083	3.91	10	0.47a	50.38-67.34
		20KT	D13	57.353	Marker102127	4.76	11.3	0.70a	48.19-59.08
	qFL_D13.3	19SY	D13	73.349	Marker102583	4.11	10.5	0.48a	70.47-82.59
		20KL	D13	89.609	Marker102789	5.54	15	0.83a	85.33-99.17
		20KT	D13	91.643	Marker102828	5.19	12.3	0.73a	85.76-95.29
FS	qFS_A01.1	19CS	A01	6.516	Marker00036	3.67	9.8	1.55a	0.00-22.89
	qFS_A01.2	19KT	A01	57.325	Marker00622	4.62	11	1.32a	54.05-60.11
		20KL	A01	58.802	Marker00775	4.45	12.2	1.00a	57.33-60.11
		20KT	A01	58.802	Marker00775	3.87	9.3	0.79a	50.21-65.06
	qFS_A01.3	19SY	A01	79.582	Marker02070	3.61	9.3	0.49a	74.47-85.74
		20KT	A01	84.452	Marker02447	3.16	7.7	0.75a	80.15-88.78
	qFS_A02.1	19KT	A02	50.104	Marker19471	3.58	8.7	1.14a	20.06-52.50
		19CS	A02	41.467	Marker19335	3.52	9.4	1.63a	39.00-54.90
		20KT	A02	35.373	Marker19269	3.75	9.1	0.82a	21.55-52.35
	qFS_A02.2	19KT	A02	125.151	Marker20524	3.48	8.4	0.98a	115.48-132.54
	qFS_A03.1	19KT	A03	83.429	Marker21339	4.79	11.4	1.46a	80.68-85.31
	qFS_A03.2	20KT	A03	105.556	Marker21473	3.02	7.4	0.20b	105.11-109.04
	qFS_A03.3	19KT	A03	147.244	Marker22483	6.66	15.5	1.32a	141.51-156.35
		20KT	A03	155.055	Marker22974	4.43	10.6	0.87a	141.51-163.34
	qFS_A04.1	19KT	A04	71.852	Marker25132	4.84	11.5	1.00a	69.97-74.56
	qFS_A05.1	19CS	A05	57.38	Marker25803	3.76	10	1.44a	47.33-58.67
	qFS_A05.2	19KT	A05	87.829	Marker26228	3.05	7.4	1.05a	63.03-93.34
		20KT	A05	87.829	Marker26228	3.87	9.3	0.75a	83.96-93.34
	qFS_A05.3	19SY	A05	152.59	Marker28677	3.51	9	0.54a	145.46-158.73
	qFS_A07.1	19KT	A07	35.138	Marker36416	3.55	8.6	1.22a	24.57-44.89
	qFS_A07.2	19KT	A07	88.171	Marker37381	3.16	7.7	1.15a	83.45-91.44
	qFS_A07.3	19KT	A07	116.279	Marker38235	3.37	8.2	1.14a	108.57-120.26
		19CS	A07	113.04	Marker38205	3.29	8.8	1.30a	108.57-116.28
	qFS_A08.1	20KT	A08	118.79	Marker50152	3.33	8.1	0.62a	117.33-124.31
	qFS_A08.2	19CQ	A08	138.114	Marker50441	3.51	11.3	1.63b	133.61-139.29
	qFS_A08.3	19KT	A08	190.973	Marker50744	3.07	7.5	1.05a	181.93-196.80
	qFS_A09.1	20KT	A09	57.505	Marker51321	3.03	7.4	0.69a	47.91-59.56
	qFS_A09.2	19CS	A09	180.395	Marker52860	3.04	8.2	1.37a	160.59-181.76
	qFS_A10.1	20KT	A10	135.072	Marker62467	4.38	10.5	0.87a	133.14-138.02
	qFS_A10.2	19CS	A10	163.716	Marker62850	3.23	8.7	1.47a	151.23-169.67
		20KT	A10	151.701	Marker62719	3.39	8.2	0.76a	147.76-157.69
	qFS_A11.1	19KT	A11	0	Marker62954	4.08	9.8	1.22a	0.00-12.27
	qFS_A11.2	19CS	A11	118.266	Marker63507	3	8.1	1.45a	109.94-123.98
	qFS_A12.1	19KT	A12	28.799	Marker65644	3.42	8.3	0.86a	24.70-31.55
	qFS_A12.2	19KT	A12	59.812	Marker65880	3.29	8	0.97a	51.65-62.33
	qFS_A12.3	19KT	A12	77.996	Marker66739	7.71	17.7	1.56a	74.83-79.58
		20KL	A12	82.39	Marker66956	4.71	12.9	0.86a	76.69-96.15
		20KT	A12	99.601	Marker67023	3.96	9.5	0.78a	76.69-102.91
	qFS_A13.1	19SY	A13	48.405	Marker68032	3.03	7.8	0.47a	43.63-54.34
		20KT	A13	48.262	Marker68018	3.17	7.7	0.67a	43.63-54.57
	qFS_D01.1	19KT	D01	20.545	Marker70767	4.67	11.1	1.30a	15.27-23.29
		19CS	D01	22.571	Marker70811	3.38	9.1	1.49a	0.00-27.88
		20KL	D01	15.269	Marker70685	4.35	12	1.04a	7.18-20.39
		20KT	D01	27.876	Marker70887	5.24	12.4	0.91a	20.39-29.67
	qFS_D01.2	19KT	D01	45.132	Marker71056	5.24	12.4	1.35a	39.54-47.49
	qFS_D02.1	19KT	D02	31.492	Marker75185	4.85	11.6	1.42a	28.54-36.57
	qFS_D02.2	19KT	D02	79.111	Marker77061	3.09	7.5	0.96a	73.66-83.64
	qFS_D03.1	19CS	D03	31.162	Marker77817	5.05	13.2	1.76a	17.22-39.80
		20KL	D03	27.086	Marker77794	3.12	8.7	0.73a	21.27-39.80
		20KT	D03	29.84	Marker77821	6.36	14.9	0.96a	26.80-39.80
	qFS_D04.1	19KT	D04	62.859	Marker79477	3.61	8.7	1.16a	52.65-71.75
	qFS_D04.2	20KL	D04	86.761	Marker80641	3.37	9.4	0.87a	80.70-93.59
	qFS_D04.3	19KT	D04	105.448	Marker80762	4.39	10.5	1.23a	81.85-111.96
		19CS	D04	119.425	Marker80863	3	8.1	1.14a	105.45-119.43
		20KL	D04	115.685	Marker80834	3.02	8.5	0.76a	105.45-119.43
		20KT	D04	119.425	Marker80863	3.44	8.3	0.21a	94.52-119.43
	qFS_D05.1	19CS	D05	59.593	Marker81190	3.4	9.1	1.54a	57.66-65.66
		20KT	D05	37.072	Marker81081	3.24	7.9	0.64a	33.98-63.13
	qFS_D05.2	20KT	D05	115.567	Marker81841	3.97	9.6	0.83a	103.68-123.99
	qFS_D07.1	19KT	D07	83.29	Marker85243	5.13	12.2	1.32a	79.01-84.87
		20KL	D07	85.597	SWU10332	3.13	8.8	0.98a	70.48-88.29
		20KT	D07	76.742	Marker85164	3.38	8.2	0.76a	60.49-85.60
	qFS_D07.2	19SY	D07	137.013	Marker85885	3.12	8.1	0.07b	133.90-137.01
	qFS_D07.3	19CS	D07	143.293	Marker86065	3.45	9.2	1.14a	137.01-144.74
	qFS_D08.1	19CS	D08	11.773	Marker86595	3.77	10	1.54a	0.31-17.57
	qFS_D08.2	19KT	D08	19.518	Marker86625	5.29	12.5	1.41a	7.31-38.32
		19SY	D08	41.541	Marker86814	4.46	11.3	0.58a	33.66-42.18
		20KT	D08	11.773	Marker86595	3.81	9.2	0.80a	7.31-46.78
		20KL	D08	38.317	Marker86770	4.7	12.9	1.13a	23.01-46.78
	qFS_D08.3	20KT	D08	64.77	Marker88379	4.26	10.2	0.75a	55.24-73.05
	qFS_D09.1	19CS	D09	35.026	Marker89692	3.87	10.3	1.57a	15.87-39.28
	qFS_D09.2	20KL	D09	105.276	Marker91436	3.15	8.8	0.87a	101.90-109.98
	qFS_D09.3	19KT	D09	120.147	Marker91618	3.13	7.6	1.07a	118.83-126.70
	qFS_D09.4	19KT	D09	136.235	Marker91854	3.14	7.6	0.96a	120.15-147.13
		19CS	D09	146.986	Marker91956	3.84	10.2	1.54a	138.39-159.35
		20KT	D09	157.552	Marker91994	3.31	8	0.57a	146.99-159.35
	qFS_D10.1	19KT	D10	43.065	Marker92199	4.97	11.8	1.34a	29.74-46.94
		20KT	D10	28.257	HAU1634	3.05	7.4	0.66a	26.05-29.74
	qFS_D10.2	19KT	D10	101.689	Marker92668	3.28	8	0.98a	93.80-104.03
	qFS_D10.3	19KT	D10	123.529	Marker93253	4.19	10	1.30a	121.01-126.54
		20KT	D10	125.971	Marker93398	4.65	11.1	0.82a	121.01-129.40
	qFS_D10.4	19CS	D10	180.86	Marker94728	4.57	12.1	1.59a	165.21-184.25
		20KL	D10	165.213	Marker94611	4.35	12	0.95a	162.10-180.86
	qFS_D11.1	19KT	D11	47.542	Marker95152	3.22	7.8	1.27a	31.90-49.14
	qFS_D11.2	19KT	D11	73.482	Marker95709	4.49	10.7	1.25a	65.01-78.13
		19SY	D11	78.412	Marker95766	5.64	14.1	0.66a	72.62-83.13
		20KT	D11	64.14	Marker95400	3.71	9	0.69a	60.73-68.99
	qFS_D12.1	19KT	D12	34.752	Marker97193	4.69	11.2	1.30a	25.09-38.79
		19CS	D12	25.089	Marker97216	4.22	11.2	1.70a	25.09-47.86
		20KL	D12	35.038	Marker97192	5.88	15.9	1.24a	25.09-38.79
	qFS_D12.2	20KT	D12	47.718	Marker97333	5.15	12.2	0.91a	43.44-64.91
	qFS_D12.3	19KT	D12	91.749	Marker99094	4.01	9.7	0.87a	85.88-94.88
		20KT	D12	91.318	Marker99078	3.42	8.3	0.64a	85.88-92.77
	qFS_D12.4	19KT	D12	137.593	Marker99835	4.48	10.7	1.42a	130.86-140.22
		20KL	D12	137.593	Marker99835	3.18	8.9	1.04a	130.86-144.60
		20KT	D12	137.593	Marker99835	4.23	10.2	0.86a	130.86-140.22
	qFS_D12.5	19CS	D12	202.236	Marker100025	3.39	9.1	1.13a	195.29-206.11
	qFS_D13.1	20KT	D13	36.834	Marker100595	3.19	7.8	0.64a	25.27-43.49
	qFS_D13.2	19KT	D13	57.211	Marker102099	6.83	15.9	1.54a	54.88-59.08
		20KT	D13	55.594	Marker102083	3.98	9.6	0.77a	52.54-65.48
	qFS_D13.3	20KL	D13	91.643	Marker102828	4.45	12.2	1.06a	85.33-99.17
		20KT	D13	90.763	Marker102796	3.81	9.2	0.78a	85.33-95.29
FM	qFM_A01.1	19CQ	A01	65.945	Marker00817	3.22	10.4	0.16a	60.11-72.89
	qFM_A01.2	19SY	A01	110.893	Marker18442	3.34	8.6	0.19b	110.02-112.76
		20KT	A01	110.893	Marker18442	4.42	10.6	0.19b	110.02-112.76
	qFM_A07.1	19SY	A07	15.911	Marker36261	4.89	12.3	0.10a	8.04-26.04
		20KT	A07	15.911	Marker36261	3.26	7.9	0.001a	8.04-23.11
	qFM_D01.1	19CS	D01	110.867	Marker74589	3.02	8.1	0.22a	105.31-113.22
	qFM_D01.2	20KL	D01	136.862	HAU1012	3.03	8.5	0.20b	132.28-136.86
	qFM_D03.1	19CQ	D03	68.161	Marker78081	3.15	10.2	0.23a	63.97-71.43
		19KT	D03	82.644	Marker78568	7.02	16.3	0.28a	63.97-83.37
		19SY	D03	82.359	Marker78535	15.32	33.8	0.41a	80.34-84.52
		20KL	D03	82.359	Marker78535	3.79	10.5	0.24a	79.33-83.37
		20KT	D03	82.359	Marker78535	6.16	14.4	0.24a	81.79-83.37
	qFM_D06.1	19SY	D06	1.17	Marker82089	3.25	8.4	0.17a	0.00-2.97
	qFM_D08.1	20KT	D08	11.773	Marker86595	4.76	11.4	0.21b	7.31-17.57
	qFM_D10.1	19CS	D10	126.399	Marker93402	3.15	8.5	0.28b	121.01-136.59
	qFM_D11.1	19CS	D11	65.01	Marker95428	3.07	8.3	0.27b	59.29-66.73
		19KT	D11	73.482	Marker95709	4.2	10.1	0.21b	69.28-77.41
	qFM_D12.1	19CQ	D12	141.017	Marker99883	3.08	10	0.10b	135.70-144.17
		19KT	D12	138.613	Marker99852	3.36	8.2	0.08b	135.70-144.17
		19CS	D12	143.269	Marker99915	3.77	10	0.25b	125.37-144.60
	qFM_D13.1	19CS	D13	45.512	Marker101445	3.14	8.4	0.18b	39.75-46.99
FU	qFU_A01.1	19CS	A01	60.105	Marker00802	3.04	8.2	0.72a	55.29-68.98
		19SY	A01	66.375	Marker01035	3.81	9.8	0.64a	45.60-67.38
		20KT	A01	55.427	Marker00583	4.87	11.6	0.74a	52.47-65.06
	qFU_A01.2	19KT	A01	84.452	Marker03835	4.82	11.5	0.79a	81.40-87.50
		19CS	A01	93.184	Marker16781	3.62	9.7	0.75a	88.21-98.55
		19SY	A01	81.402	Marker02432	3.77	9.6	0.65a	74.47-85.46
		20KT	A01	85.028	Marker04625	4.3	10.3	0.69a	81.40-87.53
	qFU_A01.3	19KT	A01	110.023	Marker18438	4.05	9.7	0.68a	100.98-116.08
		19CS	A01	110.023	Marker18425	3.08	8.3	0.71a	100.98-112.76
	qFU_A02.1	19CS	A02	52.644	Marker19538	4.03	10.7	0.79a	48.78-56.67
		20KT	A02	38.125	Marker19281	3.15	7.6	0.58a	32.45-50.10
	qFU_A02.2	19SY	A02	121.724	Marker20520	3.63	9.3	0.52a	116.19-125.15
	qFU_A03.1	19KT	A03	156.353	Marker23042	3.68	8.9	0.66a	154.77-165.37
	qFU_A05.1	19CS	A05	57.38	Marker25803	3.19	8.6	0.76a	46.45-58.67
	qFU_A07.1	20KT	A07	51.317	Marker36575	3.22	7.8	0.58a	44.89-53.33
	qFU_A07.2	19KT	A07	120.257	Marker38301	3.24	7.9	0.49a	116.28-128.73
	qFU_A08.1	20KT	A08	27.524	Marker39549	3.59	8.7	0.44a	8.53-27.52
	qFU_A08.2	19SY	A08	124.305	Marker50265	3.74	9.6	0.62a	120.68-132.45
	qFU_A08.3	19SY	A08	148.231	Marker50662	3.85	9.8	0.63a	141.55-154.24
	qFU_A08.4	19SY	A08	181.926	NBRI1260	3.16	8.2	0.59a	181.93-190.26
	qFU_A09.1	19SY	A09	57.505	Marker51311	3.51	9	0.62a	51.91-67.37
	qFU_A10.1	19CS	A10	15.161	Marker52953	3.98	10.6	0.75a	12.30-25.47
	qFU_A10.2	19KT	A10	152.664	Marker62731	3.4	8.2	0.52a	145.46-153.82
	qFU_A12.1	19KT	A12	28.799	Marker65644	3.89	9.4	0.58a	24.70-30.84
	qFU_A12.2	19CS	A12	47.994	Marker65785	3.2	8.6	0.73a	44.88-49.47
	qFU_A12.3	19KT	A12	78.424	Marker66878	6.9	16	0.90a	76.69-82.39
		19CS	A12	79.582	Marker66931	3.97	10.6	0.82a	78.28-96.15
		19SY	A12	78.424	Marker66768	6.76	16.6	0.85a	76.11-82.39
		20KL	A12	96.149	Marker66993	3.55	9.9	0.62a	79.58-103.93
		20KT	A12	79.582	Marker66931	4.1	9.8	0.65a	78.28-96.15
	qFU_A13.1	19SY	A13	5.037	Marker67691	3.04	7.9	0.59a	1.08-11.65
	qFU_A13.2	19SY	A13	48.405	Marker68032	3.24	8.4	0.57a	43.63-54.06
	qFU_A13.3	19KT	A13	101.254	Marker70376	3.87	9.3	0.54a	96.17-102.67
		19SY	A13	98.894	Marker70297	4.9	12.4	0.71a	95.46-99.89
		20KT	A13	99.515	Marker70354	3.67	8.9	0.59a	88.42-107.50
	qFU_D01.1	19KT	D01	21.116	Marker70784	5.47	12.9	0.77a	18.19-23.29
		19CS	D01	21.259	Marker70787	4.19	11.1	0.77a	20.39-29.67
		19SY	D01	21.259	Marker70787	3.42	8.8	0.61a	18.19-29.67
	qFU_D01.2	20KT	D01	77.518	Marker71687	3.12	7.6	0.57a	72.34-81.77
	qFU_D03.1	19KT	D03	42.684	Marker77846	3.29	8	0.63a	41.51-45.27
	qFU_D05.1	19SY	D05	26.478	Marker80999	3.47	8.9	0.60a	18.69-29.77
	qFU_D05.2	20KT	D05	62.698	Marker81224	3.11	7.6	0.56a	31.22-65.66
	qFU_D05.3	20KT	D05	116.444	Marker81845	4.63	11.1	0.70a	103.68-123.99
	qFU_D07.1	19KT	D07	52.89	Marker85017	3.12	7.6	0.57a	49.63-59.76
	qFU_D07.2	19KT	D07	143.151	Marker86052	3.07	7.5	0.52a	136.44-149.25
		19CS	D07	143.293	Marker86065	4.46	11.8	0.66a	137.01-145.62
	qFU_D07.3	19KT	D07	164	SWU10778	3.3	8	0.54a	158.52-171.59
	qFU_D08.1	19KT	D08	17.572	Marker86612	6.67	15.5	0.93a	13.24-22.01
		19CS	D08	23.014	Marker86655	3.83	10.2	0.83a	13.24-27.29
		20KL	D08	23.014	Marker86655	3.06	8.6	0.63a	20.53-35.74
		20KT	D08	17.572	Marker86612	3.67	8.9	0.66a	13.24-22.58
	qFU_D08.2	19KT	D08	35.738	Marker86768	3.58	8.7	0.70a	33.66-42.18
		19CS	D08	35.738	Marker86768	3.82	10.2	0.85a	32.78-43.90
		19SY	D08	52.825	Marker86994	3.14	8.1	0.46a	35.74-53.25
		20KT	D08	35.738	Marker86768	3.63	8.8	0.65a	33.66-46.78
	qFU_D08.3	19CS	D08	64.77	Marker88379	4	10.6	0.77a	55.24-69.65
	qFU_D09.1	19KT	D09	123.662	Marker91668	4.79	11.4	0.69a	118.83-125.84
		19SY	D09	112.931	Marker91515	4.6	11.7	0.71a	102.04-118.83
	qFU_D10.1	19CS	D10	64.162	Marker92335	3.65	9.7	0.67a	58.44-67.95
		20KL	D10	58.441	Marker92314	3.78	10.5	0.71a	49.90-64.16
	qFU_D10.2	19KT	D10	101.689	Marker92668	5.17	12.3	0.84a	94.95-104.03
	qFU_D10.3	19KT	D10	123.819	Marker93266	3.07	7.5	0.64a	121.01-126.40
	qFU_D10.4	20KL	D10	135.861	Marker94089	3.51	9.8	0.52a	131.55-148.30
	qFU_D10.5	19CS	D10	165.213	Marker94611	3.62	9.7	0.76a	163.11-176.14
		19SY	D10	165.213	Marker94611	3.45	8.9	0.60a	162.10-176.14
		20KL	D10	165.213	Marker94611	3.66	10.2	0.62a	162.10-180.86
	qFU_D11.1	19KT	D11	77.551	Marker95764	5.14	12.2	0.81a	68.99-80.36
		19SY	D11	72.331	Marker95671	8.96	21.4	0.95a	71.61-77.41
		20KT	D11	72.331	Marker95671	5.5	13	0.76a	71.18-77.41
	qFU_D12.1	19CS	D12	47.718	Marker97333	4.95	13	0.92a	43.44-47.86
		20KL	D12	47.718	Marker97333	4.68	12.8	0.74a	43.44-47.86
	qFU_D12.2	19KT	D12	91.607	Marker99093	3.25	7.9	0.45a	85.88-92.77
		19SY	D12	91.318	Marker99078	5.73	14.3	0.81a	85.88-94.88
		20KT	D12	91.318	Marker99078	3.01	7.3	0.57a	91.32-99.74
	qFU_D12.3	19CS	D12	105.916	Marker99373	3.8	10.1	0.79a	102.51-110.13
		20KT	D12	105.916	Marker99373	3.55	8.6	0.62a	105.20-116.26
	qFU_D12.4	19KT	D12	130.857	Marker99718	5.25	12.4	0.85a	125.37-133.82
		19CS	D12	130.857	Marker99718	6.64	17	1.09a	127.47-133.82
		20KT	D12	127.467	Marker99667	3.15	7.7	0.61a	121.94-130.86
	qFU_D12.5	19KT	D12	202.236	Marker100025	5.03	11.9	0.61a	195.29-206.11
	qFU_D13.1	20KT	D13	30.101	Marker100445	3.17	7.7	0.60a	25.99-36.55
	qFU_D13.2	19KT	D13	61.828	Marker102269	6.36	14.9	0.82a	59.08-71.72
		19CS	D13	62.685	Marker102328	3.87	10.3	0.79a	57.07-65.91
		19SY	D13	51.388	Marker101886	6.55	16.2	0.69a	48.19-53.71
		20KL	D13	51.388	Marker101875	3.65	10.2	0.68a	47.41-55.59
		20KT	D13	52.541	Marker101899	3.58	8.7	0.61a	48.19-65.48
	qFU_D13.3	19SY	D13	74.67	Marker102622	6.22	15.4	0.82a	70.47-80.50
		20KL	D13	78.153	Marker102644	4.28	11.8	0.77a	70.47-79.33
		20KT	D13	77.868	Marker102636	4.1	9.9	0.67a	69.59-79.33
	qFU_D13.4	20KL	D13	97.693	Marker102853	5.15	14	0.81a	91.64-99.17
FE	qFE_A01.1	19KT	A01	26.982	Marker00061	3.74	9	0.002b	24.49-31.05
	qFE_A03.1	19KT	A03	136.444	Marker22400	3.08	7.5	0.002a	130.23-146.51
	qFE_A05.1	19CS	A05	203.892	Marker28942	4.74	12.5	0.04a	193.37-212.38
	qFE_A07.1	19KT	A07	26.184	Marker36322	3.02	7.4	0.03a	23.40-32.91
	qFE_A08.1	19KT	A08	190.259	Marker50714	3.27	7.9	0.03a	181.93-204.21
		20KL	A08	190.973	Marker50744	3.72	10.5	0.05a	185.59-196.80
	qFE_A09.1	19KT	A09	181.755	Marker52870	3.58	8.7	0.02a	165.75-181.76
	qFE_A10.1	19CQ	A10	25.465	Marker53005	3.15	10.2	0.02b	17.79-41.27
	qFE_A10.2	19KT	A10	153.681	Marker62749	3.08	7.5	0.03a	151.70-157.69
		19CS	A10	154.402	Marker62794	4.09	10.9	0.05a	152.66-163.72
		20KL	A10	153.681	Marker62749	3.42	9.7	0.05a	137.74-157.69
	qFE_A12.1	19KT	A12	27.487	Marker65638	4.02	9.7	0.02a	23.05-30.84
	qFE_A12.2	19CQ	A12	40.224	Marker65730	3.63	11.6	0.02b	35.20-46.98
	qFE_A12.3	19KT	A12	78.424	Marker66878	4	9.6	0.03a	76.69-82.39
		20KL	A12	78.746	Marker66930	3.59	10.2	0.02a	74.40-82.39
	qFE_D01.1	19KT	D01	20.831	Marker70779	6.32	14.8	0.04a	11.10-22.57
		20KL	D01	22.571	Marker70811	3.8	10.7	0.05a	7.18-24.75
	qFE_D01.2	19CQ	D01	39.254	Marker70961	3.94	12.6	0.05b	31.62-44.99
	qFE_D02.1	19KT	D02	31.492	Marker75185	6.75	15.7	0.04a	29.77-36.57
	qFE_D02.2	19CS	D02	59.62	Marker75840	4.21	11.2	0.05a	56.95-67.75
	qFE_D02.3	19KT	D02	115.111	Marker77630	3.27	7.9	0.02a	108.05-133.55
		19CS	D02	121.798	Marker77670	4.4	11.7	0.05a	119.91-124.36
		19SY	D02	129.1	Marker77713	3.9	10	0.02a	124.36-137.87
	qFE_D03.1	19CS	D03	19.924	Marker77773	3.01	8.2	0.04a	14.97-31.16
	qFE_D04.1	19CQ	D04	71.031	Marker79849	3.01	9.8	0.04b	69.30-76.60
	qFE_D07.1	19KT	D07	83.29	Marker85243	5.85	13.8	0.03a	79.01-84.16
	qFE_D08.1	19KT	D08	22.008	Marker86642	5.96	14	0.04a	17.57-27.29
	qFE_D08.2	19CS	D08	162.357	Marker88878	3.35	9	0.05a	158.56-164.14
	qFE_D09.1	20KL	D09	105.276	Marker91436	3.27	9.3	0.05a	102.04-109.17
	qFE_D10.1	19SY	D10	150.553	Marker94436	3.41	8.8	0.01a	148.15-159.36
	qFE_D10.2	19CS	D10	176.719	Marker94666	3.17	8.6	0.03a	176.14-181.29
		20KL	D10	178.75	Marker94711	3.4	9.7	0.03a	176.14-184.25
	qFE_D13.1	19KT	D13	58.286	Marker102241	4.52	10.8	0.03a	55.59-62.543
"a" indicate that the additive effect was contributed by CCRI35, and "b" indicate that the additive effect was contributed by TX-832.
