# Supplementary material for: Analyzing Quantitative Trait Loci for Fiber Quality and Yield-Related Traits From a Recombinant Inbred Line Population With Gossypium hirsutum Race palmeri as One Parent
Source: Front Plant Sci. 2022 Jan 3;12:817748. doi: 10.3389/fpls.2021.817748 (PMC8763314; doi:10.3389/fpls.2021.817748)
Supplement: Supplementary file 8 [file Table_8.XLSX]

## Sheet: 工作表1
	Table S8 QTL for yield related traits identified in the present study
Trait	ID	Environment	Chromosome	Position	Locus	LOD	PVE (%)	Additive Effect	Confidence Intervel
BW	qBW_A01.1	19KT	A01	58.287	Marker00626	4.49	11	0.3a	54.05-67.38
		19SY	A01	66.232	Marker00982	4.06	10.1	0.27a	58.80-67.82
		20KL	A01	54.047	Marker00534	4.69	13.1	0.33a	39.78-58.29
	qBW_A01.2	19KT	A01	88.782	Marker16484	3.34	8.3	0.26a	79.58-116.08
	qBW_A03.1	19CS	A03	42.988	Marker21010	3.34	8.6	0.18b	40.18-62.29
	qBW_A03.2	19KT	A03	83.714	Marker21356	5.08	12.3	0.26a	82.98-85.31
	qBW_A03.3	19SY	A03	196.681	Marker23404	3.37	8.4	0.08b	190.47-199.44
	qBW_A05.1	19KT	A05	83.674	Marker25991	4.36	10.7	0.28a	63.03-93.34
	qBW_A05.2	19CQ	A05	164.297	Marker28762	3.01	8.2	0.25a	158.73-166.88
	qBW_A06.1	19CQ	A06	35.638	Marker29274	3.03	8.2	0.29a	30.52-40.84
	qBW_A07.1	19KT	A07	45.194	Marker36452	5.74	13.8	0.34a	35.14-46.20
	qBW_A08.1	20KT	A08	129.935	Marker50331	3.12	8.2	0.23a	120.68-132.45
	qBW_A09.1	19SY	A09	57.505	Marker51311	3.94	9.8	0.29a	48.62-68.54
	qBW_A09.2	19CQ	A09	161.25	Marker52824	3.25	8.8	0.15a	150.61-166.62
	qBW_A10.1	19KT	A10	44.013	Marker53093	4.25	10.4	0.28a	38.75-54.92
	qBW_A10.2	19KT	A10	80.024	Marker60324	3.22	8	0.27a	72.27-88.08
	qBW_A11.1	19KT	A11	113.135	Marker63455	3.05	7.6	0.25a	109.51-118.27
		19CS	A11	118.266	Marker63507	3.09	8	0.2a	114.30-121.82
	qBW_A12.1	19KT	A12	0	Marker65531	3.47	8.6	0.24a	0.00-8.66
		19CS	A12	8.657	Marker65553	3.17	8.2	0.14a	0.00-20.06
	qBW_A12.2	19KT	A12	29.67	Marker65647	3.12	7.7	0.23a	23.05-31.55
	qBW_A12.3	19CS	A12	47.994	Marker65785	3.02	7.8	0.21a	40.22-49.47
	qBW_A12.4	19CQ	A12	99.601	Marker67023	3.91	10.5	0.32a	96.15-102.91
		19CS	A12	79.582	Marker66931	3.58	9.2	0.21a	59.81-100.48
	qBW_A13.1	19KT	A13	5.037	Marker67691	3.19	7.9	0.25a	0.00-11.65
	qBW_A13.2	19KT	A13	101.254	Marker70376	3.81	9.4	0.26a	99.04-103.53
	qBW_D01.1	19CQ	D01	21.401	Marker70791	3.3	9	0.28a	15.27-31.62
		19KT	D01	21.401	Marker70791	6.53	15.5	0.32a	18.19-31.62
		20KL	D01	18.006	Marker70703	4.17	11.7	0.26a	11.10-20.39
	qBW_D01.2	19KT	D01	61.349	Marker71196	3	7.5	0.24a	51.95-78.67
	qBW_D04.1	19KT	D04	34.781	Marker79056	3.1	7.7	0.23a	30.93-38.26
	qBW_D04.2	19CQ	D04	52.645	Marker79229	3.87	10.4	0.29a	48.73-57.15
		19KT	D04	62.859	Marker79477	3.46	8.6	0.18a	52.65-73.18
	qBW_D05.1	19CS	D05	26.478	Marker80999	3.19	8.2	0.2a	21.77-30.20
	qBW_D07.1	19KT	D07	0	Marker84959	3.58	8.8	0.24a	0.00-14.58
	qBW_D08.1	19SY	D08	46.78	Marker86896	3.07	7.7	0.26a	43.90-51.23
	qBW_D08.2	19CS	D08	62.833	Marker88305	3.95	10.1	0.23a	62.40-69.65
	qBW_D09.1	19KT	D09	80.376	Marker91293	4.97	12.1	0.28a	65.90-86.14
	qBW_D09.2	19KT	D09	101.895	Marker91421	4.3	10.5	0.27a	101.90-107.01
		19SY	D09	111.761	Marker91512	3.68	9.2	0.28a	109.17-123.66
	qBW_D10.1	19KT	D10	46.944	Marker92230	3.98	9.8	0.28a	43.07-64.45
		20KL	D10	58.441	Marker92314	4.12	11.6	0.29a	49.90-64.16
	qBW_D10.2	19CQ	D10	148.296	Marker94427	3.42	9.3	0.28a	132.57-150.55
		20KL	D10	136.593	Marker94099	3.59	10.2	0.29a	133.31-139.09
	qBW_D12.1	20KL	D12	35.038	Marker97192	3.28	9.4	0.27a	25.09-38.79
	qBW_D12.2	20KT	D12	102.367	Marker99313	3.12	8.3	0.2a	99.74-110.715
	qBW_D12.3	19KT	D12	130.857	Marker99718	3.09	7.7	0.26a	125.37-135.68
	qBW_D13.1	19CQ	D13	72.611	Marker102575	3.56	9.6	0.29a	53.71-74.67
		19KT	D13	72.611	Marker102575	6.61	15.7	0.33a	70.47-73.79
		19CS	D13	72.611	Marker102575	3.57	9.2	0.21a	59.08-83.46
		20KL	D13	65.621	Marker102412	3.36	9.5	0.21a	65.05-69.44
		20KT	D13	67.343	Marker102470	3.26	8.6	0.22a	50.38-69.44
SI	qSI_A01.1	19CS	A01	58.484	Marker00635	3.75	9.1	0.43a	45.60-65.06
	qSI_A05.1	19KT	A05	83.674	Marker25991	3.57	8.7	0.4a	82.37-93.34
		20KT	A05	87.829	Marker26228	4.37	10.5	0.45a	82.37-93.34
	qSI_A08.1	20KT	A08	0	NBRI1147	3.18	7.7	0.23a	0.00-8.53
	qSI_A10.1	19SY	A10	173.386	Marker62899	3.97	9.9	0.32b	169.67-179.50
	qSI_A11.1	20KT	A11	213.777	Marker65408	3.71	9	0.39b	206.10-219.62
	qSI_A12.1	20KT	A12	79.582	Marker66931	4.29	10.3	0.45a	77.71-96.15
	qSI_D01.1	19KT	D01	21.116	Marker70784	4.87	11.6	0.45a	18.19-31.62
		19CS	D01	29.666	Marker70933	4.92	11.8	0.54a	26.86-39.25
	qSI_D04.1	19CS	D04	60.551	Marker79310	3.05	7.5	0.36a	48.73-68.06
	qSI_D05.1	20KT	D05	116.73	Marker81848	3.62	8.8	0.34a	103.68-123.99
	qSI_D06.1	19CQ	D06	24.387	Marker82200	3.05	8.1	0.47b	18.61-32.38
	qSI_D07.1	19KT	D07	52.89	Marker85017	4.14	10	0.34a	49.63-59.76
	qSI_D09.1	19CS	D09	123.662	Marker91668	3.09	7.6	0.34a	121.88-128.93
	qSI_D11.1	20KT	D11	101.569	Marker96519	3.13	7.6	0.01b	97.45-104.76
	qSI_D12.1	20KT	D12	72.782	Marker98586	4.07	9.8	0.42a	62.86-77.77
	qSI_D13.1	19KT	D13	86.188	Marker102767	3.31	8.1	0.21a	83.46-89.61
LP	qLP_A03.1	19CQ	A03	62.287	Marker21248	3.74	10	1.55a	56.39-69.42
	qLP_A07.1	19KT	A07	105.468	Marker38060	5.12	12.2	1.64a	103.99-108.38
		20KL	A07	105.468	Marker38060	4.21	11.7	1.75a	103.99-119.97
	qLP_A07.2	19KT	A07	178.078	Marker39354	3.06	7.4	1.11a	171.02-181.49
	qLP_A08.1	19CS	A08	144.975	Marker50537	3.38	8.5	1.45a	139.29-154.24
	qLP_A10.1	19SY	A10	145.601	Marker62632	3.25	8.2	1.26a	139.19-147.76
		20KL	A10	144.018	Marker62600	3.61	10.1	1.58a	143.29-147.76
		20KT	A10	145.458	Marker62691	3.69	8.9	1.39a	143.29-147.76
	qLP_A11.1	19CQ	A11	118.266	Marker63507	3.74	10	1.8a	114.30-122.39
		20KL	A11	118.266	Marker63507	3.51	9.9	1.44a	113.14-121.82
		20KT	A11	118.266	Marker63507	3.35	8.1	1.26a	114.30-121.82
	qLP_A11.2	19KT	A11	180.45	Marker65061	3.06	7.5	1.25a	175.77-189.81
	qLP_A11.3	20KT	A11	220.941	Marker65421	3.07	7.5	1.3a	209.50-228.41
	qLP_A12.1	19SY	A12	195.707	Marker67608	3	7.6	0.58a	192.00-196.73
	qLP_D02.1	19CS	D02	52.757	Marker75447	4.77	11.7	1.8a	51.60-58.88
	qLP_D03.1	19CQ	D03	69.026	Marker78132	9.07	22.6	2.52a	63.97-83.37
		19KT	D03	68.007	Marker78080	11.69	25.6	2.26a	67.85-71.43
		19CS	D03	68.161	Marker78081	4.88	12	1.7a	63.97-89.70
		19SY	D03	82.359	Marker78535	8.87	20.8	2.2a	80.78-87.66
		20KL	D03	69.168	Marker78149	4.89	13.4	1.81a	63.97-83.52
		20KT	D03	86.814	Marker78628	7.73	17.8	2.12a	82.36-89.70
	qLP_D10.1	19CS	D10	89.623	Marker92566	3.55	8.9	1.48a	79.06-93.80
LI	qLI_A05.1	20KT	A05	120.303	Marker27207	3.05	7.6	0.24a	119.21-126.89
	qLI_A07.1	20KL	A07	105.468	Marker38060	3.99	11.1	0.44a	102.83-120.83
	qLI_A08.1	20KT	A08	9.705	Marker39516	3.84	9.5	0.35a	0.00-22.27
	qLI_A08.2	20KL	A08	132.451	Marker50374	3.04	8.6	0.35a	120.68-136.33
	qLI_A10.1	20KL	A10	157.692	Marker62833	3.21	9	0.18a	143.29-163.72
		20KT	A10	145.601	Marker62632	4.25	10.4	0.38a	144.02-158.12
	qLI_A11.1	20KL	A11	118.266	Marker63507	3.11	8.8	0.35a	109.51-130.26
		20KT	A11	118.266	Marker63507	5.33	12.9	0.43a	113.14-121.82
	qLI_A11.2	20KT	A11	175.765	Marker65013	3.12	7.8	0.24a	175.77-180.16
	qLI_D03.1	19HN	D03	82.359	Marker78535	6.43	15.6	0.46a	79.33-86.81
		20KT	D03	68.007	Marker78080	7.35	17.3	0.47a	63.97-72.45
	qLI_D09.1	20KL	D09	121.876	Marker91654	3.29	9.3	0.37a	112.93-125.84
		20KT	D09	114.089	Marker91549	5.21	12.6	0.39a	109.17-118.83
"a" indicate that the additive effect was contributed by CCRI35, and "b" indicate that the additive effect was contributed by TX-832.
