# Supplementary material for: Analyzing Quantitative Trait Loci for Fiber Quality and Yield-Related Traits From a Recombinant Inbred Line Population With Gossypium hirsutum Race palmeri as One Parent
Source: Front Plant Sci. 2022 Jan 3;12:817748. doi: 10.3389/fpls.2021.817748 (PMC8763314; doi:10.3389/fpls.2021.817748)
Supplement: Supplementary file 9 [file Table_9.XLSX]

## Sheet: 工作表1
	Table S9 QTL clusters and the cantained QTL
	ID	Genetic Interval	QTL
	cluster_A01.1	45.60-72.89	qBW_A01.1a3	qFL_A01.1a4	qFM_A01.1a1	qFS_A01.2a3	qFU_A01.1a3	qSI_A01.1a1
	cluster_A01.2	72.89-116.08	qBW_A01.2a1	qFL_A01.2a4	qFL_A01.3b1	qFM_A01.2b2	qFS_A01.3a2	qFU_A01.2a4	qFU_A01.3a2
	cluster_A02.1	39.00-56.67	qFL_A02.1a2	qFS_A02.1a3	qFU_A02.1a2
	cluster_A02.2	115.48-132.54	qFL_A02.3a2	qFS_A02.2a1	qFU_A02.2a1
	cluster_A03.1#	80.68-85.31	qFL_A03.1a1	qFS_A03.1a1	qBW_A03.2a1
	cluster_A03.2#	147.24-165.37	qFL_A03.3a2	qFS_A03.3a2	qFU_A03.1a1
	cluster_A05.1	43.26-58.67	qFL_A05.1a1	qFS_A05.1a1	qFU_A05.1a1
	cluster_A05.2	63.03-93.34	qBW_A05.1a1	qFL_A05.2a1	qFS_A05.2a2	qSI_A05.1a2
	cluster_A07.1#	23.40-59.71	qFS_A07.1a1	qFL_A07.2a1	qBW_A07.1a1	qFU_A07.1a1	qFE_A07.1a1	qFL_A07.1a1
	cluster_A07.2#	102.83-128.73	qFS_A07.3a2	qFU_A07.2a1	qLI_A07.1a1	qLP_A07.1a2
	cluster_A08.1	0.00-27.52	qSI_A08.1a1	qLI_A08.1a1	qFL_A08.1a1	qFU_A08.1a1
	cluster_A08.2	117.33-139.29	qBW_A08.1a1	qFL_A08.2a4	qFL_A08.3b1	qFS_A08.1a1	qFS_A08.2b1	qFU_A08.2a1	qLI_A08.2a1
	cluster_A08.3	139.29-154.24	qLP_A08.1a1	qFL_A08.4a1	qFU_A08.3a1
	cluster_A08.4	181.93-196.80	qFU_A08.4a1	qFE_A08.1a2	qFL_A08.5a3	qFS_A08.3a1
	cluster_A09.1	48.62-68.54	qBW_A09.1a1	qFL_A09.1a3	qFS_A09.1a1	qFU_A09.1a1
	cluster_A09.2	150.61-181.76	qBW_A09.2a1	qFS_A09.2a1	qFE_A09.1a1
	cluster_A10.1	133.29-163.72	qFS_A10.1a1	qFE_A10.2a3	qFL_A10.3a4	qFS_A10.2a2	qFU_A10.2a1	qLI_A10.1a2	qLP_A10.1a3
	cluster_A11.1#	109.94-123.98	qBW_A11.1a2	qFS_A11.2a1	qLI_A11.1a2	qLP_A11.1a3
	cluster_A12.1#	23.05-31.55	qFE_A12.1a1	qBW_A12.2a1	qFL_A12.2a1	qFS_A12.1a1	qFU_A12.1a1
	cluster_A12.2	35.20-62.33	qFE_A12.2a1	qBW_A12.3a1	qFS_A12.2a1	qFU_A12.2a1
	cluster_A12.3#	74.83-102.91	qBW_A12.4a2	qFE_A12.3a2	qFL_A12.3a5	qFS_A12.3a3	qFU_A12.3a5	qSI_A12.1a1
	cluster_A13.1	0.00-11.65	qBW_A13.1a1	qFU_A13.1a1	qFL_A13.1a1
	cluster_A13.2	43.63-54.57	qFL_A13.3a2	qFS_A13.1a2	qFU_A13.2a1
	cluster_A13.3#	95.46-107.50	qBW_A13.2a1	qFL_A13.4a3	qFU_A13.3a3
	cluster_D01.1#	11.10-31.62	qBW_D01.1a3	qFE_D01.1a2	qFL_D01.1a3	qFS_D01.1a4	qFU_D01.1a3	qSI_D01.1a2
	cluster_D01.2	51.95-81.47	qBW_D01.2a1	qFL_D01.2a1	qFU_D01.2a1
	cluster_D02.1#	28.54-36.57	qFE_D02.1a1	qFL_D02.1a1	qFS_D02.1a1
	cluster_D03.1#	14.97-45.21	qFE_D03.1a1	qFS_D03.1a3	qFL_D03.1a3	qFU_D03.1a1
	cluster_D03.2#	52.67-84.52	qFL_D03.2a1	qFM_D03.1a5	qLI_D03.1a2	qLP_D03.1a6
	cluster_D04.1	48.73-76.60	qBW_D04.2a1	qFE_D04.1b1	qFL_D04.1a1	qFS_D04.1a1	qSI_D04.1a1
	cluster_D04.2	80.70-111.96	qFS_D04.2a1	qFL_D04.2a2	qFS_D04.3a4
	cluster_D05.1	11.93-30.20	qFL_D05.1b1	qBW_D05.1a1	qFU_D05.1a1
	cluster_D05.2	31.22-65.66	qFL_D05.2a4	qFS_D05.1a2	qFU_D05.2a1
	cluster_D05.3	103.68-123.99	qFS_D05.2a1	qFL_D05.3a2	qFU_D05.3a1	qSI_D05.1a1
	cluster_D07.1#	73.21-84.16	qFE_D07.1a1	qFL_D07.1a3	qFS_D07.1a3
	cluster_D07.2	133.90-149.25	qFS_D07.2b1	qFL_D07.3a1	qFS_D07.3a1	qFU_D07.2a2
	cluster_D08.1#	7.31-42.18	qFE_D08.1a1	qFL_D08.1a4	qFS_D08.1a5	qFU_D08.1a4	qFU_D08.2a4	qFM_D08.1b1
	cluster_D08.2	55.24-73.05	qBW_D08.2a1	qFS_D08.3a1	qFU_D08.3a1	qFL_D08.2a1
	cluster_D09.1#	101.90-128.93	qBW_D09.2a2	qFE_D09.1a1	qFL_D09.2a3	qFS_D09.2a1	qFU_D09.1a2	qLI_D09.1a2	qSI_D09.1a1
	cluster_D10.1#	29.74-49.90	qBW_D10.1a2	qFL_D10.1a2	qFS_D10.1a2
	cluster_D10.2#	93.80-107.42	qFS_D10.2a1	qFU_D10.2a1	qFL_D10.2a2
	cluster_D10.3	121.01-159.36	qFL_D10.3a4	qFM_D10.1b1	qFS_D10.3a2	qFU_D10.3a1	qBW_D10.2a2	qFE_D10.1a1	qFU_D10.4a1
	cluster_D10.4	162.10-184.25	qFE_D10.2a2	qFL_D10.4a3	qFS_D10.4a2	qFU_D10.5a3
	cluster_D11.1#	68.99-83.13	qFL_D11.1a5	qFM_D11.1b2	qFS_D11.2a3	qFU_D11.1a3
	cluster_D12.1#	25.09-47.86	qBW_D12.1a1	qFL_D12.1a4	qFS_D12.1a3	qFU_D12.1a2
	cluster_D12.2#	85.88-110.72	qBW_D12.2a1	qFL_D12.2a3	qFS_D12.3a2	qFU_D12.2a3	qFU_D12.3a2
	cluster_D12.3#	125.37-144.60	qBW_D12.3a1	qFL_D12.3a3	qFM_D12.1b3	qFS_D12.4a3	qFU_D12.4a3
	cluster_D13.1	25.99-46.99	qFU_D13.1a1	qFL_D13.1a3	qFM_D13.1a1	qFS_D13.1a1
	cluster_D13.2#	48.19-61.83	qFE_D13.1a1	qFL_D13.2a4	qFS_D13.2a2	qFU_D13.2a5
	cluster_D13.3#	70.47-99.17	qBW_D13.1a5	qFU_D13.3a3	qSI_D13.1a1	qFL_D13.3a3	qFS_D13.3a2	qFU_D13.4a1
	“#” indicating major QTL clusters. The superscript "a" and "b" indicating that additive effect was contributed by CCRI35 and TX-832, respectively. The superscript Arabic numbers indicating the number of environment that the QTL was identified.
