# Supplementary material for: Analyzing Quantitative Trait Loci for Fiber Quality and Yield-Related Traits From a Recombinant Inbred Line Population With Gossypium hirsutum Race palmeri as One Parent
Source: Front Plant Sci. 2022 Jan 3;12:817748. doi: 10.3389/fpls.2021.817748 (PMC8763314; doi:10.3389/fpls.2021.817748)
Supplement: Supplementary file 11 [file Table_11.xlsx]

## Sheet: 工作表1
	Table S11 Common QTL in the persent study with previous reports
	Trait	QTLs in the present study	Chromosome	Previous QTLs	Reference
	BW	qBW_D13.1	D13	qBW-Chr18-2	Shang et al. 2016
		qBW_D13.1	D13	qBW-F2:3-D13-1	Zhang et al. 2014
	FE	qFE_A10.2	A10	qFE10.1	Shao et al. 2014
		qFE_D02.3	D02	F2-qFE-c14-1	Yu et al. 2013
				qFE-14-1	Feng et al. 2015
				qFE-08A-c14-1	Yu et al. 2012
	FL	qFL_A08.5	A08	qFL08.1	Zhang et al. 2011
				qFL-Pop1-A8-1	Zhang et al. 2016
				qFL-C8-2	Shi et al. 2019
		qFL_A10.3	A10	qFL-C10-1	Wang et al. 2015
				qFL10.1	Shao et al. 2014
				qFL-Chr10-1	Liang et al. 2013
				qFL-c10-1	Wang H. et al. 2016
				qFL-C10-4	Shi et al. 2019
		qFL_A12.3	A12	FL-qTL-5	Ma J. et al. 2018
		qFL_A13.4	A13	qFL-F2-A13-1	Zhang et al. 2014
		qFL_D01.1	D01	qFL-C15-1	Shi et al. 2020
		qFL_D03.1	D03	qFL17.1	Liu et al. 2017
		qFL_D05.2	D05	qFL-C19-2	Deng et al. 2019
				qFL-TX48-D5-1	Feng et al. 2015
		qFL_D07.1	D07	FL-C16-1	Jamshed et al. 2016
				qFL-D07-3	Wang et al. 2020
				qFL16.2	Wang F. et al. 2016
		qFL_D10.3	D10	qFL20.1	Zhang et al. 2011
				qFL-D10_14	Diouf et al. 2018
		qFL_D10.4	D10	qFL-C20-2	Deng et al. 2019
				qGhFL-D10	Shen et al. 2019
		qFL_D11.1	D11	FL-C21-1	Jamshed et al. 2016
				FL-qTL-18	Ma J. et al. 2018
				qFL-D11-1	Ning et al. 2014
				qFL-D11_cb	Diouf et al. 2018
		qFL_D12.2	D12	qFL26.1	Liu et al. 2017
				qFL26.1	Shao et al. 2014
		qFL_D12.3	D12	qFL_D12_cb	Diouf et al. 2018
				qFL26.1	Tang et al. 2015
		qFL_D13.2	D13	qFL-Chr18-1	Ma et al. 2019
		qFL_D13.3	D13	FL-C18-3	Jamshed et al. 2016
				qFL18.1	Wang F. et al. 2016
				qFL-D13-1	Wang et al. 2020
	FM	qFM_D03.1	D03	qFM-D03-1	Wang et al. 2020
				qFM-D03-15	Diouf et al. 2018
		qFM_D12.1	D12	qFM-Chr26-1	Shang et al. 2015
	FS	qFS_A01.2	A01	qFS-01-1	Li et al. 2019
		qFS_A02.1	A02	qFS-A02-1c	Shen et al. 2005
		qFS_D01.1	D01	qFS-D1-1	Wang et al. 2020
				qFS-C15-3	Shi et al. 2020
				qFS-15-1	Li et al. 2019
		qFS_D04.3	D04	qGhFS-D04	Shen et al. 2019
		qFS_D07.1	D07	qFS16.1	Tang et al. 2015
				Fiber strength QTL	Shen et al. 2006
				F2:3-qFs-c16-1	Yu et al. 2013
		qFS_D09.4	D09	qSTR23-1	Chen et al. 2020
		qFS_D10.3	D10	qFS-20.11	Guo et al. 2018
		qFS_D11.2	D11	qFS-D11-1	Su et al. 2013
		qFS_D12.1	D12	qFS-D12-1	Wang et al. 2020
		qFS_D12.4		qFS-D12_14	Diouf et al. 2018
	FU	qFU_D08.1	D08	F2:3-qFU-c24-2	Yu et al. 2013
		qFU_D08.2	D08	qFU-C24-2	Deng et al. 2019
		qFU_D10.5	D10	qFU20.1	Zhang et al. 2011
	LP	qLP_D03.1	D03	qLP-C17-1	Wang et al. 2013
				qLP-D03-1	Wang et al. 2020
				qLP-D03-15	Diouf et al. 2018
				qLP-C17-1	Shi et al. 2015
